# Supplementary material for: 182Tungsten Mössbauer spectroscopy of heteropolytungstates
Source: Royal Society of Chemistry journal article supplement (doi:10.1039/b904101j), 2009-01-01
Supplement: b904101j.pdf [file b904101j.pdf]

## **<sup>182</sup>Tungsten Mössbauer spectroscopy of heteropolytungstates**

**Christian G. Bochet, Thérèse Draper, Bernard Bocquet, Michael T. Pope and Alan F. Williams<sup>\*a</sup>**

### **Supplementary material**

Characterisation of compounds:

***Infrared Spectroscopy (IR)***

The infrared spectra were recorded from KBr pellets with a Perkin-Elmer TR-850 or IR-883 spectrophotometer. Wavenumbers are given in  $\text{cm}^{-1}$ . Abbreviations for the intensities: vs, very strong; s, strong; m, medium; w, weak; vw, very weak; sh, shoulder.

**H<sub>4</sub>SiW<sub>12</sub>O<sub>40</sub> 8 H<sub>2</sub>O**: DPP (H<sub>2</sub>O-AcONa/AcOH 1M): -310 (1), -530 (1), -985 (2). TLC: R<sub>f</sub>=0.63. TGA: 5.79% (calcd for 8 H<sub>2</sub>O: 5.89%). IR: 1018 (w), 980 (s), 923 (s), 882 (m), 784 (s), 560 (sh), 538 (m), 475 (w), 417 (w), 374 (s), 335 (s), 281 (w), 270 (w), 254 (m).

**K<sub>4</sub>SiW<sub>12</sub>O<sub>40</sub> 10 H<sub>2</sub>O**: DPP (H<sub>2</sub>O-AcONa/AcOH 1M): -345 (1), -580 (1), -1025 (2). TLC: R<sub>f</sub>=0.64. TGA: 5.56% (calcd for 10 H<sub>2</sub>O: 5.61%). IR: 1020 (w), 980 (s), 925 (s), 893 (w), 877 (m), 779 (vs), 555 (sh), 539 (m), 477 (w), 419 (w), 378 (s), 282 (m).

**[(C<sub>4</sub>H<sub>9</sub>)<sub>4</sub>N]<sub>4</sub>SiW<sub>12</sub>O<sub>40</sub>**: DPP (MeCN/LiClO<sub>4</sub> 0.2M): -700 (1), -960 (1), -1500 (3), -1620 (2). TLC: R<sub>f</sub>=0.60. TGA: 26.0% (calcd for 0 H<sub>2</sub>O: 26.1%). IR: 2952 (m), 2930 (sh), 2866 (m), 1478 (m), 1455 (m), 1375 (m), 1009 (m), 966 (s), 929 (s), 882 (m), 795 (vs), 552 (sh), 542 (m), 515 (sh), 481 (w), 415 (vw), 386 (s), 339 (m), 280 (w).

**H<sub>3</sub>PW<sub>12</sub>O<sub>40</sub> 8.5 H<sub>2</sub>O**: DPP (EtOH/LiClO<sub>4</sub> 1M): -360 (1), -590 (1), -750 (3), -1120 (2). TGA: 7.46% (calcd for 8.5 H<sub>2</sub>O 7.65%). IR: 1078 (s), 981 (s), 887 (s), 798 (vs), 595 (w), 523 (m), 480 (sh), 385 (s), 337 (m), 265 (m).

**[(C<sub>4</sub>H<sub>9</sub>)<sub>4</sub>N]<sub>3</sub>PW<sub>12</sub>O<sub>40</sub>**: DPP (MeCN/LiClO<sub>4</sub> 0.2M): -395 (1), -655 (1), -905 (2), -1315 (1). TLC: R<sub>f</sub>=0.66. TGA: 20.4% (calcd for 0 H<sub>2</sub>O: 22.8%). IR: 2960 (m), 2940 (w), 2880 (m), 1470 (m), 1460 (m), 1380 (m), 1080 (s), 1025 (w), 987 (sh), 976 (s), 895 (s), 735 (sh), 657 (w), 596 (w), 522 (m), 387 (s), 375 (sh), 335 (m).

**Cs<sub>3</sub>PW<sub>12</sub>O<sub>40</sub> 6 H<sub>2</sub>O**: TGA: 3.24% (calcd for 6 H<sub>2</sub>O: 3.19%). IR: 1080 (s), 1000 (sh), 980 (s), 890 (m), 790 (vs), 600 (w), 520 (m), 500 (sh), 380 (s), 330 (m), 268 (m).

**Na<sub>3</sub>PW<sub>12</sub>O<sub>40</sub> 9 H<sub>2</sub>O**: DPP (H<sub>2</sub>SO<sub>4</sub> 1M): -350 (2), -480 (1), -800 (2). TGA: 7.68% (calcd for 9 H<sub>2</sub>O: 7.50%). IR: 1080 (s), 980 (s), 920 (sh), 890 (m), 790 (vs), 600 (w), 530 (m), 380 (s), 330 (m), 340 (m).

**K<sub>5</sub>AlW<sub>12</sub>O<sub>40</sub> 15 H<sub>2</sub>O**: DPP (H<sub>2</sub>O-AcONa/AcOH 1M): -480 (1), -710 (1), -1010 (4). TLC: R<sub>f</sub>=0.48. TGA: 8.22% (calcd for 15 H<sub>2</sub>O: 8.09%). IR: 957 (s), 90 (s), 797 (s), 534 (m), 485 (m), 417 (w), 371 (m).

**Cs<sub>5</sub>AlW<sub>12</sub>O<sub>40</sub> 6 H<sub>2</sub>O**: DPP (H<sub>2</sub>SO<sub>4</sub> 0.1M/Na<sub>2</sub>SO<sub>4</sub> 0.9M): -445(1), -620 (1), -770 (1). TLC: R<sub>f</sub>=0.58. TGA: 3.23% (calcd for 6 H<sub>2</sub>O: 2.96%). IR: 954 (s), 873 (s), 800 (s), 757, 537 (m), 485 (m), 472 (m), 374 (s).

**[(C<sub>4</sub>H<sub>9</sub>)<sub>4</sub>N]<sub>4</sub>HAlW<sub>12</sub>O<sub>40</sub> 3 H<sub>2</sub>O**: TLC: R<sub>f</sub>=0.58. TGA: 27.3% (calcd for 3 H<sub>2</sub>O: 27.3%). IR: 990 (sh), 956 (s), 910 (sh), 878 (s), 800 (vs), 750 (sh), 540 (w), 485 (w), 475 (sh), 400 (sh), 380 (m), 355 (sh), 328 (sh).

**H<sub>5</sub>BW<sub>12</sub>O<sub>40</sub> 15 H<sub>2</sub>O**: DPP (H<sub>2</sub>O -AcOH/AcONa 1M): -380 (1), -595 (1), -1045 (2). TGA: 10.14% (calcd for 15 H<sub>2</sub>O:10.06%).

**K<sub>5</sub>BW<sub>12</sub>O<sub>40</sub> 11 H<sub>2</sub>O** : DPP (H<sub>2</sub>O -AcOH/AcONa 1M): -540 (1), -770 (1). TLC: Rf=0.63. TGA: 6.23% (calcd for 11 H<sub>2</sub>O: 6.09%). IR: 1000 (m), 957 (s), 905 (s), 800 (vs), 520 (sh), 510 (m), 480 (sh), 423 (w), 380 (m), 335 (m), 285.

**[(C<sub>4</sub>H<sub>9</sub>)<sub>4</sub>N]<sub>3</sub>AsW<sub>12</sub>O<sub>40</sub>** : DPP (MeCN/LiClO<sub>4</sub> 0.2M): -425 (1), -680 (1), -950 (2), -1320 (1). TLC: Rf=0.66. TGA: 23.53% (calcd: 23.72%). IR: 2980 (m), 2930 (sh), 2870 (m), 1460 (m), 1380 (m), 983 (s), 912 (s), 873 (m), 793 (vs), 735 (sh), 680 (w), 525 (m), 470 (m), 420 (w), 381 (s), 358 (sh), 325 (w).

**Cs<sub>3</sub>AsW<sub>12</sub>O<sub>40</sub> 10 H<sub>2</sub>O** : DPP (H<sub>2</sub>O -AcOH/AcONa 1M): -540 (1), -840 (2), -910 (2). TGA: 5.32% (calcd for 10 H<sub>2</sub>O: 5.15%). IR: 968 (s), 890 (s), 865 (sh), 792 (s), 740 (sh), 620 (sh), 520 (m), 472 (m), 466 (s), 418 (m), 322 (w), 301 (w).

**[(C<sub>4</sub>H<sub>9</sub>)<sub>4</sub>N]HFeW<sub>12</sub>O<sub>40</sub> 4 H<sub>2</sub>O** : TLC: Rf=0.59. TGA: 27.6% (calcd for 4 H<sub>2</sub>O: 27.5%). IR: 952 (s), 915 (sh), 872 (s), 775 (s), 725 (sh), 680 (vw), 580-500, 448 (s), 372 (s).

**[(C<sub>4</sub>H<sub>9</sub>)<sub>4</sub>N]<sub>4</sub>H<sub>2</sub>CoW<sub>12</sub>O<sub>40</sub> 6 H<sub>2</sub>O** : DPP (MeCN/LiClO<sub>4</sub> 0.2M): -650 (1), -900 (1), -1350 (1). TLC: Rf=0.40. TGA: 28.2% (calcd for 6 H<sub>2</sub>O: 28.3%). IR: 2960 (m), 2920 (m), 2860 (m), 1480 (m), 1455 (sh), 1380 (m), 943 (s), 887 (s), 786 (vs), 682 (sh), 565, 445 (s), 366 (s). UV-Vis (MeCN): 17718 (sh, 104.5), 16824 (sh, 183.6), 16000 (210.45), 15576 (sh, 194).

**[(C<sub>4</sub>H<sub>9</sub>)<sub>4</sub>N]<sub>4</sub>GeW<sub>12</sub>O<sub>40</sub>** : DPP (MeCN/LiClO<sub>4</sub> 0.2M): -675 (1), -900 (1), -1175 (1). TLC: Rf=0.61. TGA: 25.6% (calcd for 0 H<sub>2</sub>O: 25.8%). IR: 2958 (m), 2930 (sh), 2863 (m), 1480 (m), 1455 (m), 1378 (m), 990 (sh), 962 (s), 880 (s), 830 (m), 780 (s), 530 (w), 464 (m), 410 (vw), 380 (s).

**[(C<sub>4</sub>H<sub>9</sub>)<sub>4</sub>N]<sub>4</sub>H<sub>2</sub>ZnW<sub>12</sub>O<sub>40</sub> 3 H<sub>2</sub>O** : DPP: -470 (1), -650 (4), -980 (1). TLC: Rf=0.35. TGA: 27.3% (calcd for 3 H<sub>2</sub>O: 27.3%). IR: 2960 (m), 2920 (sh), 2860 (m), 1460 (m), 1375 (m), 970 (sh), 943 (s), 875 (s), 760 (vs), 680 (w), 446 (m), 365 (m).

**K<sub>6</sub>H<sub>2</sub>W<sub>12</sub>O<sub>40</sub> 2 H<sub>2</sub>O** : DPP (H<sub>2</sub>O -AcOH/AcONa 1M): -700 (1), -780 (1), -960 (2), -1140 (4). TLC: Rf=0.33. IR: 1396 (m), 1354 (w), 1252 (s), 969 (m), 950 (s), 876 (s), 762 (vs), 609 (m), 420 (s), 375 (s), 325 (w), 282 (m).
